# Supplementary material
Source: PubMed Central journal article supplement (PMC4787880)

**Appendix 1** Flow chart of participation and follow-up in the Reykjavik Study [posted as supplied by author]

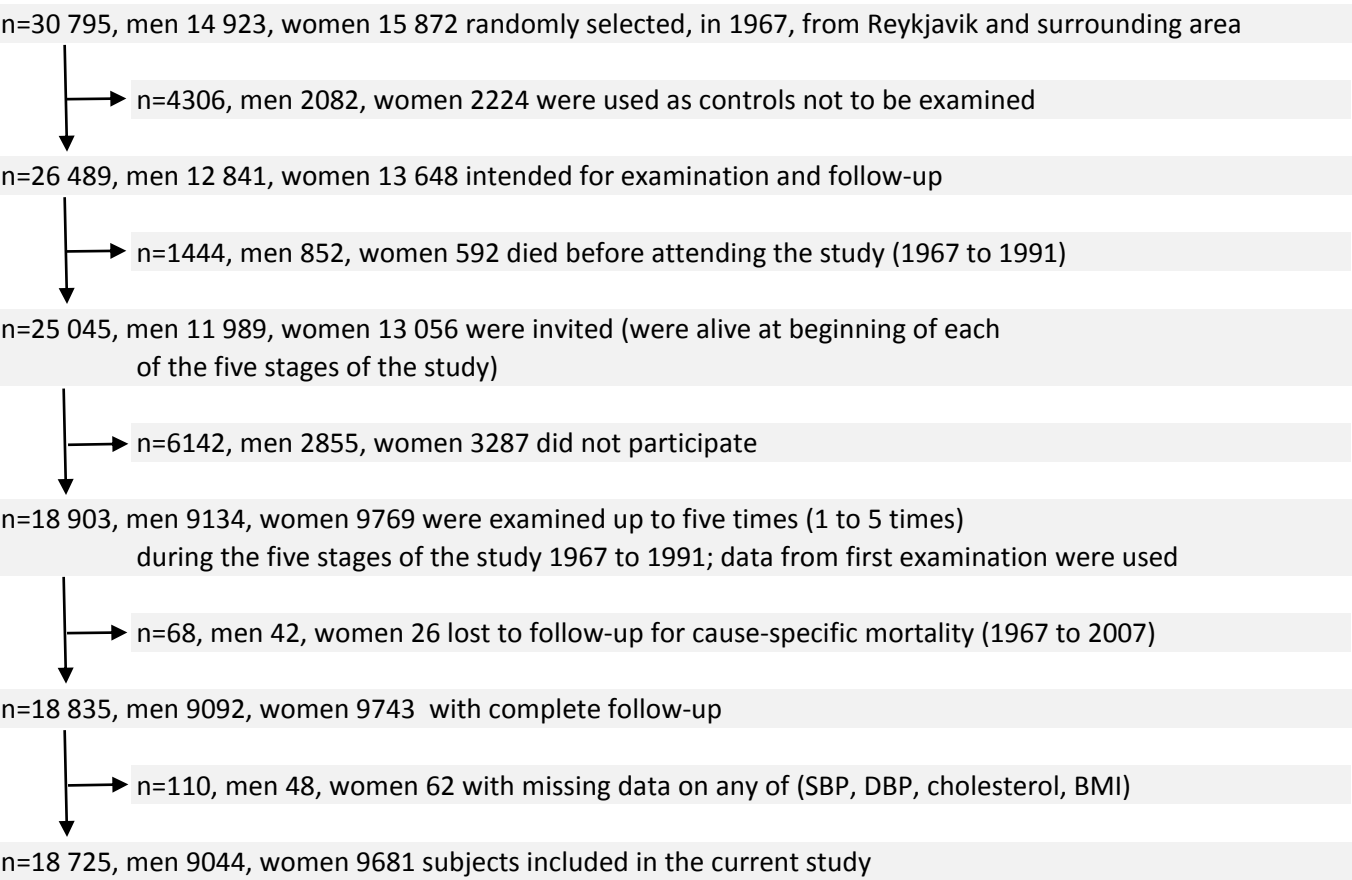

Supplement: gudl760348.ww1_default.pdf [file gudl760348.ww1_default.pdf]
