# Supplementary material
Source: PubMed Central journal article supplement (PMC4787880)
Supplement: gudl760348.ww2_default.pdf [file gudl760348.ww2_default.pdf]

**Appendix 2** non-CV mortality split up in cancer mortality and mortality other than CV or cancer according to migraine status in men and women in the Reykjavik Study (n=18 725)\* [posted as supplied by author]

|                                          | Hazard Ratio and (95% Confidence Interval) |                        |                            |                        |                            |
|------------------------------------------|--------------------------------------------|------------------------|----------------------------|------------------------|----------------------------|
|                                          | No headache                                | Non-migraine headache† | Migraine                   | Migraine without aura‡ | Migraine with aura§        |
| <b>Cancer mortality</b>                  |                                            |                        |                            |                        |                            |
| <b>Men</b>                               |                                            |                        |                            |                        |                            |
| Died/total                               | 1333/7068                                  | 238/1405               | 93/571                     | 16/128                 | 77/443                     |
| age-adjusted                             | 1.00                                       | 0.93 (0.81 to 1.07)    | 0.94 (0.76 to 1.16)        | 0.66 (0.40 to 1.07)    | 1.03 (0.82 to 1.29)        |
| mv-adj.II                                | 1.00                                       | 0.92 (0.80 to 1.06)    | 0.94 (0.76 to 1.16)        | 0.68 (0.41 to 1.11)    | 1.03 (0.82 to 1.29)        |
| <b>Women</b>                             |                                            |                        |                            |                        |                            |
| Died/total                               | 930/6003                                   | 306/2226               | 214/1452                   | 68/498                 | 146/954                    |
| age-adjusted                             | 1.00                                       | 0.92 (0.80 to 1.04)    | 1.01 (0.87 to 1.18)        | 0.93 (0.73 to 1.20)    | 1.06 (0.89 to 1.26)        |
| mv-adj.II                                | 1.00                                       | 0.93 (0.82 to 1.06)    | 1.04 (0.90 to 1.21)        | 0.99 (0.77 to 1.26)    | 1.07 (0.90 to 1.28)        |
| <b>Men and women</b>                     |                                            |                        |                            |                        |                            |
| Died/total                               | 2363/13071                                 | 544/3631               | 307/2023                   | 84/626                 | 223/1397                   |
| age- & sex-adjusted                      | 1.00                                       | 0.93 (0.84 to 1.02)    | 1.00 (0.88 to 1.13)        | 0.88 (0.70 to 1.09)    | 1.05 (0.92 to 1.21)        |
| mv-adj.II                                | 1.00                                       | 0.93 (0.85 to 1.03)    | 1.02 (0.90 to 1.15)        | 0.92 (0.74 to 1.14)    | 1.06 (0.93 to 1.22)        |
| <b>Mortality other than CV or cancer</b> |                                            |                        |                            |                        |                            |
| <b>Men</b>                               |                                            |                        |                            |                        |                            |
| Died/total                               | 1100/7068                                  | 219/1405               | 82/571                     | 19/128                 | 63/443                     |
| age-adjusted                             | 1.00                                       | 1.07 (0.92 to 1.23)    | 1.05 (0.84 to 1.32)        | 1.00 (0.63 to 1.57)    | 1.07 (0.83 to 1.38)        |
| mv-adj.II                                | 1.00                                       | 1.06 (0.92 to 1.23)    | 1.07 (0.86 to 1.34)        | 1.02 (0.65 to 1.61)    | 1.08 (0.84 to 1.40)        |
| <b>Women</b>                             |                                            |                        |                            |                        |                            |
| Died/total                               | 967/6003                                   | 325/2226               | 228/1452                   | 64/498                 | 164/954                    |
| age-adjusted                             | 1.00                                       | 1.03 (0.90 to 1.16)    | <b>1.21 (1.04 to 1.40)</b> | 1.02 (0.79 to 1.31)    | <b>1.30 (1.10 to 1.54)</b> |
| mv-adj.II                                | 1.00                                       | 1.05 (0.92 to 1.19)    | <b>1.24 (1.07 to 1.44)</b> | 1.07 (0.83 to 1.37)    | <b>1.33 (1.13 to 1.57)</b> |
| <b>Men and women</b>                     |                                            |                        |                            |                        |                            |
| Died/total                               | 2067/13071                                 | 544/3631               | 310/2023                   | 83/626                 | 227/1397                   |
| age- & sex-adjusted                      | 1.00                                       | 1.04 (0.94 to 1.14)    | <b>1.15 (1.02 to 1.30)</b> | 1.00 (0.80 to 1.25)    | <b>1.22 (1.07 to 1.41)</b> |
| mv-adj.II                                | 1.00                                       | 1.05 (0.95 to 1.15)    | <b>1.19 (1.05 to 1.34)</b> | 1.04 (0.84 to 1.30)    | <b>1.25 (1.09 to 1.43)</b> |

\* Subjects were originally 18 903, but 68 (0.36%) were lost to follow-up for cause specific mortality and 110 (0.58%) had missing data on blood pressure, cholesterol or body mass index, n=18 725 and in all 470 990 years of follow-up.

† headache without or with one migrainous symptom once or more per month.

‡ 2-3 of unilateral, photophobia, nausea symptoms.

§ Migraine with visual or sensory symptoms, or both. Participants with symptoms of migraine without aura and migraine with aura were classified as migraine with aura.

II multivariable-adjusted: age, body mass index, smoking (no, current, previous), education (primary, secondary, college-university), systolic and diastolic blood pressure and antihypertensive medical use.

Bolded values are statistically significant (p<0.05).

CV: Cardiovascular.
