# Supplementary material
Source: PubMed Central journal article supplement (PMC4787880)
Supplement: gudl760348.ww4_default.pdf [file gudl760348.ww4_default.pdf]

**Appendix 4** Age adjusted absolute 10-year risk of CV and all-cause mortality according to migraine status [posted as supplied by author]

| Endpoint<br>Gender<br>Adjustment | Absolute 10-year risk (%) and (95% Confidence Interval) |                           |                     |                           |                        |
|----------------------------------|---------------------------------------------------------|---------------------------|---------------------|---------------------------|------------------------|
|                                  | No<br>headache                                          | Non-migraine<br>headache† | Migraine            | Migraine<br>without aura‡ | Migraine<br>with aura§ |
| <b>All-cause</b>                 |                                                         |                           |                     |                           |                        |
| <b>Men</b>                       | (n=7068)                                                | (n=1405)                  | (n=571)             | (n=128)                   | (n=443)                |
| Age 50                           | 6.8 (6.3 to 7.3)                                        | 6.7 (6.1 to 7.3)          | 7.6 (6.7 to 8.5)    | 6.3 (4.8 to 7.7)          | 8.0 (7.0 to 9.0)       |
| Age 60                           | 17.4 (16.4 to 18.4)                                     | 17.3 (15.9 to 18.6)       | 19.4 (17.3 to 21.4) | 16.2 (12.6 to 19.7)       | 20.3 (18.0 to 22.6)    |
| Age 70                           | 40.6 (38.4 to 42.7)                                     | 40.3 (37.4 to 43.2)       | 44.3 (40.1 to 48.2) | 38.2 (30.6 to 45.0)       | 46.1 (41.5 to 50.4)    |
| <b>Women</b>                     | (n=6003)                                                | (n=2226)                  | (n=1452)            | (n=498)                   | (n=954)                |
| Age 50                           | 3.0 (2.8 to 3.3)                                        | 3.1 (2.8 to 3.4)          | 3.4 (3.0 to 3.8)    | 3.0 (2.5 to 3.5)          | 3.6 (3.2 to 4.0)       |
| Age 60                           | 8.8 (8.1 to 9.5)                                        | 9.0 (8.2 to 9.8)          | 9.8 (8.8 to 10.8)   | 8.8 (7.4 to 10.1)         | 10.3 (9.2 to 11.5)     |
| Age 70                           | 24.1 (22.4 to 25.9)                                     | 24.6 (22.5 to 26.7)       | 26.7 (24.1 to 29.1) | 24.0 (20.6 to 27.4)       | 27.9 (25.0 to 30.7)    |
| <b>CV mortality</b>              |                                                         |                           |                     |                           |                        |
| <b>Men</b>                       | (n=7068)                                                | (n=1405)                  | (n=571)             | (n=128)                   | (n=443)                |
| Age 50                           | 3.3 (3.0 to 3.6)                                        | 3.3 (2.8 to 3.7)          | 4.2 (3.5 to 4.9)    | 3.5 (2.4 to 4.7)          | 4.4 (3.6 to 5.2)       |
| Age 60                           | 9.3 (8.6 to 10.1)                                       | 9.3 (8.2 to 10.4)         | 11.8 (10.0 to 13.6) | 10.0 (6.8 to 13.0)        | 12.4 (10.3 to 14.4)    |
| Age 70                           | 24.9 (22.8 to 27.0)                                     | 24.8 (21.8 to 27.6)       | 30.8 (26.3 to 35.1) | 26.5 (18.5 to 33.6)       | 32.2 (27.1 to 36.8)    |
| <b>Women</b>                     | (n=6003)                                                | (n=2226)                  | (n=1452)            | (n=498)                   | (n=954)                |
| Age 50                           | 0.6 (0.5 to 0.7)                                        | 0.6 (0.5 to 0.8)          | 0.7 (0.5 to 0.8)    | 0.6 (0.4 to 0.8)          | 0.7 (0.5 to 0.8)       |
| Age 60                           | 2.4 (2.1 to 2.8)                                        | 2.7 (2.3 to 3.1)          | 2.8 (2.3 to 3.3)    | 2.5 (1.8 to 3.2)          | 2.9 (2.3 to 3.5)       |
| Age 70                           | 9.9 (8.6 to 11.3)                                       | 11.1 (9.3 to 12.8)        | 11.4 (9.3 to 13.4)  | 10.3 (7.6 to 13.0)        | 11.8 (9.5 to 14.1)     |

† Headache without or with one migraineous symptom once or more per month.

‡ 2-3 of unilateral, photophobia, nausea symptoms.

§ Migraine with visual or sensory symptoms, or both. Participants with symptoms of migraine without aura and migraine with aura were classified as migraine with aura.

CV: Cardiovascular.
